# Supplementary material for: miR-489-3p/SIX1 Axis Regulates Melanoma Proliferation and Glycolytic Potential
Source: PubMed Central journal article supplement (PMC7109510; doi:10.1016/j.omto.2019.11.001), 2019-11-27
Supplement: mmc1.pdf [file mmc1.pdf]

**OMTO, Volume 16**

## **Supplemental Information**

### **miR-489-3p/SIX1 Axis Regulates Melanoma**

#### **Proliferation and Glycolytic Potential**

**Xuhui Yang, Xiang Zhu, Zhifeng Yan, Chenxi Li, Hui Zhao, Luyuan Ma, Deyu Zhang, Juan Liu, Zihao Liu, Nan Du, Qinong Ye, and Xiaojie Xu**

# Figure S1

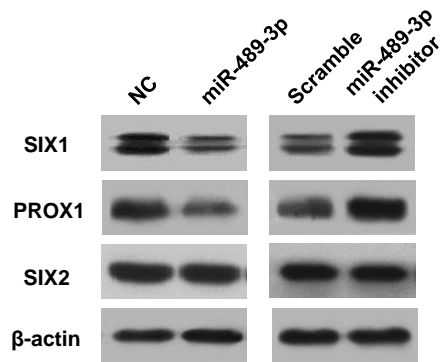

**Supplementary Figure 1. Screening for the target of miR-489-3p in HEK293T cells.** Immunoblot analysis of transfected with NC or miR-489-3p mimics, or scramble or miR-489-3p inhibitor in HEK293T cells. NC and scramble were used as negative control for miRNA mimics and miRNA inhibitor respectively.  $\beta$ -actin, a loading control.

# Figure S2

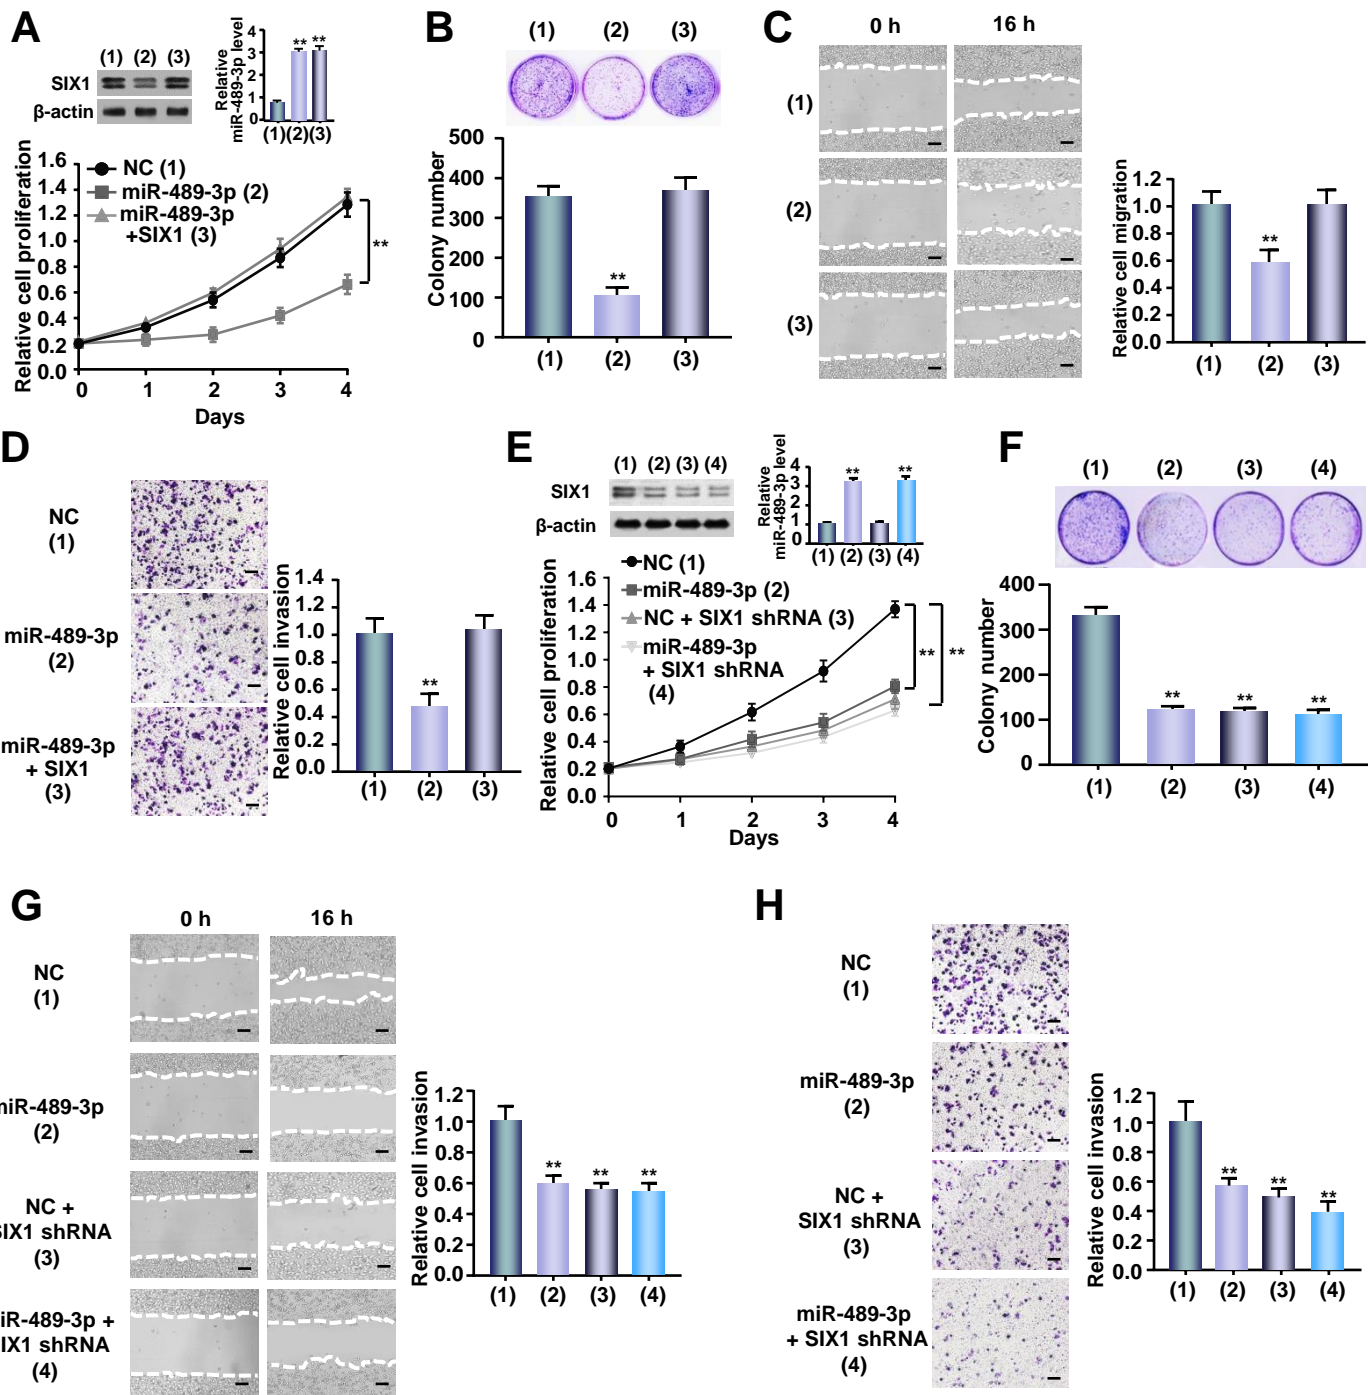

**Supplementary Figure 2. miR-489-3p suppresses proliferation, migration and invasion via targeting SIX1 in SK-MEL-2 cells.** (A) SK-MEL-2 cells were transfected with miR-489-3p mimics or miR-489-3p mimics plus SIX1 expression vector. Cell numbers was assessed by CCK-8 assay. The representative immunoblot shows SIX1 expression. Histograms display miR-489-3p expression determined by qRT-PCR. (B) Colony formation assay of SK-MEL-2 cells transfected as in (A). Illustrative images show colonies in plates (upper panels). Histograms show colony number. (C and D) Wound healing (C) and invasion (D) assays of SK-MEL-2 cells transfected as in (A). Right histograms show comparative cell migration and invasion. (E and F) Lentivirus mediated-SIX1 knockdown (SIX1 shRNA) or control SK-MEL-2 cells were transfected with NC or miR-489-3p mimics and analyzed as in (A) and (B). (G and H) Wound healing (G) and invasion (H) assays of lentivirus mediated-SIX1 knockdown (SIX1 shRNA) or control SK-MEL-2 cells were transfected as in (E). Scale bar, 100  $\mu$ m. All values illustrated are mean  $\pm$  SD of triplicate measurements and have been duplicated 3 times with similar results (\*\* $p < 0.01$  versus corresponding control).

# Figure S3

## A

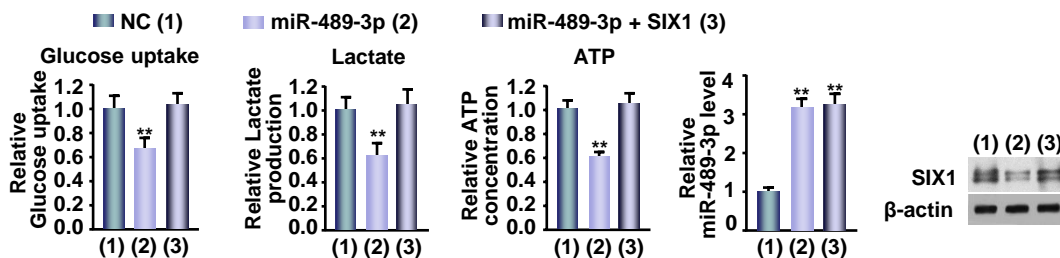

## B

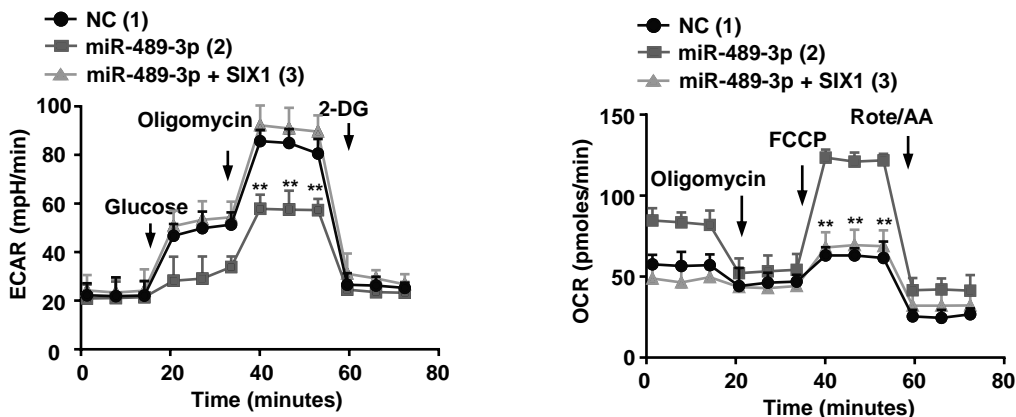

## C

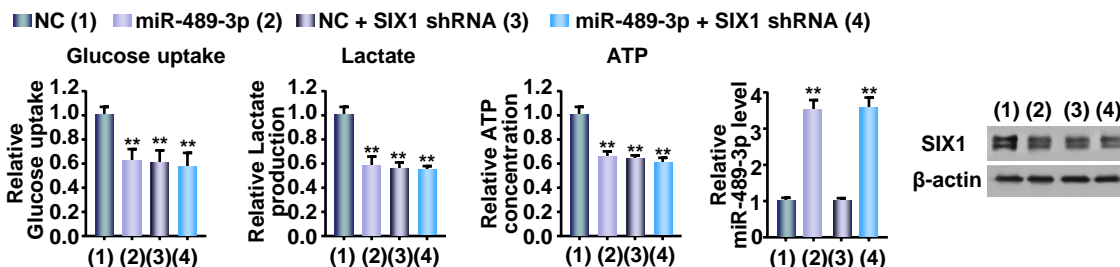

## D

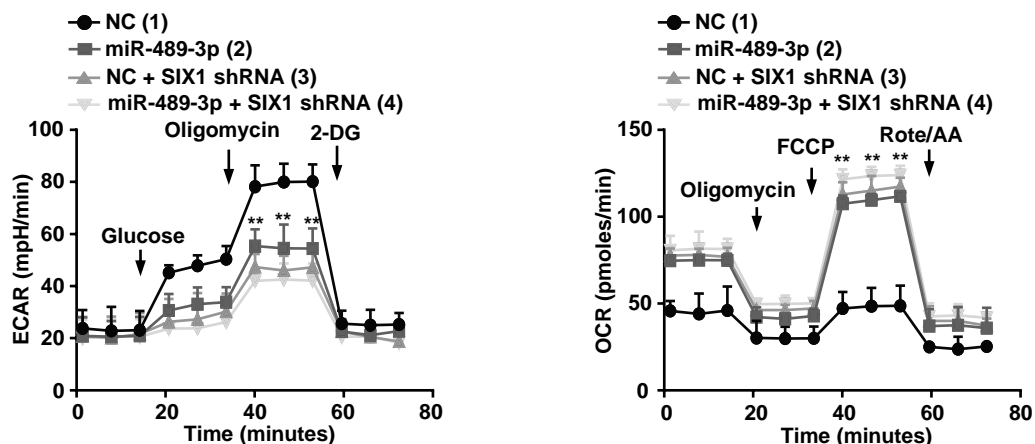

**Supplementary Figure 3. miR-489-3p inhibits glycolysis via inhibition of SIX1 expression in SK-MEL-2 cells.** (A) SK-MEL-2 cells were transfected with miR-489-3p mimics or miR-489-3p mimics plus SIX1. Glucose uptake and lactate production and ATP production were measured. Typical immunoblot reveals the expression of SIX1. qRT-PCR analysis shows miR-489-3p expression. (B) SK-MEL-2 cells were transfected as in (A), and ECAR and OCR were measured. (C) Lentivirus mediated-SIX1 knockdown (SIX1 shRNA) or control SK-MEL-2 cells were transfected with NC or miR-489-3p mimics and examined as in (A). (D) ECAR and OCR assays of lentivirus mediated-SIX1 knockdown (SIX1 shRNA) or control SK-MEL-2 cells were transfected as in (C). All values displayed are mean  $\pm$  SD and have been duplicated 3 times with similar results (A-D). \*\* $P < 0.01$  versus corresponding NC.

# Figure S4

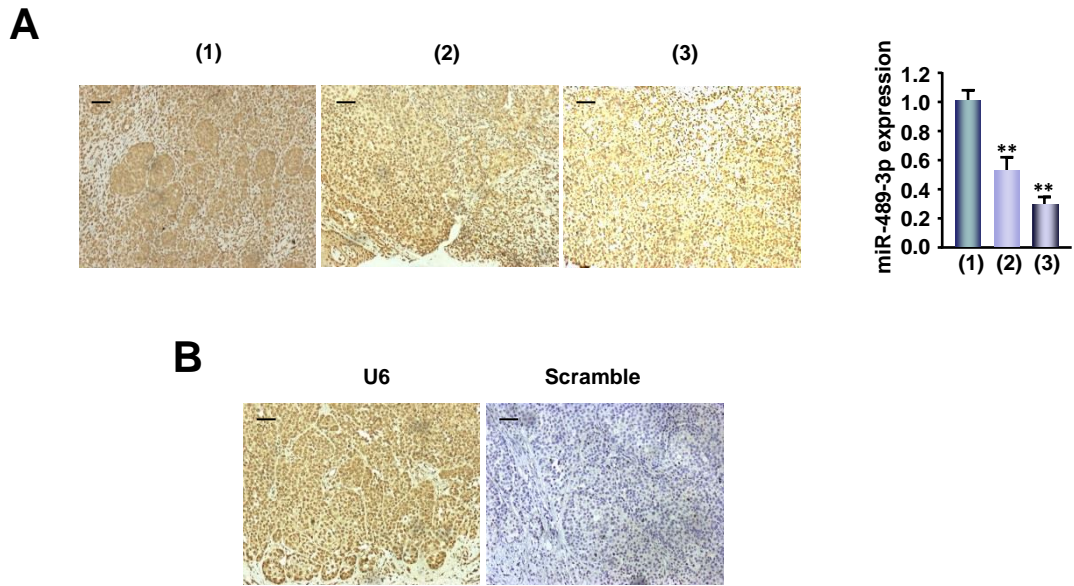

**Supplementary Figure 4. Validation of the specificity of miR-489-3p probe.** (A) Different miR-489-3p expression levels in 3 different melanoma tissues assessed by MISH (left panel) were measured by qRT-PCR (right panel). Data shown are mean  $\pm$  SD of triplicate measurements and have been duplicated 3 times with similar results. \*\* $P < 0.01$  versus case (1). (B) Positive control (U6) and negative control (Scramble) from the MISH kit were confirmed. Scale bar, 100  $\mu$ m.

# Figure S5

## A

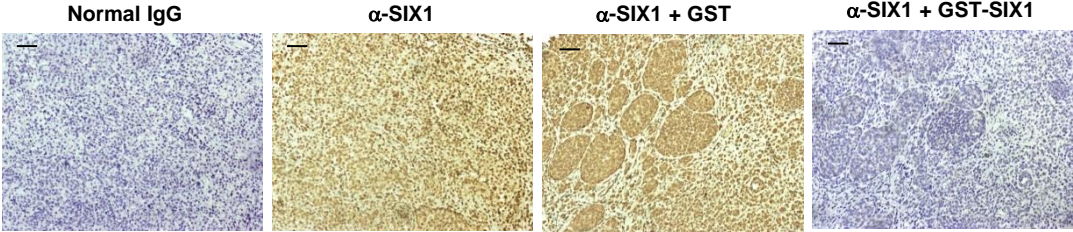

## B

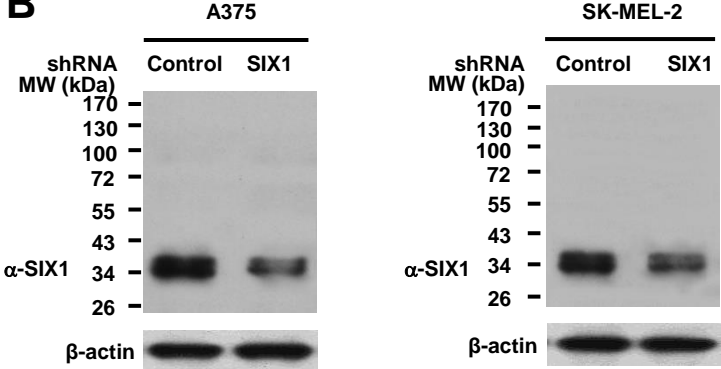

**Supplementary Figure 5. Confirmation of antibody specificity to SIX1.** (A) Immunohistochemical staining of melanoma samples incubated with normal IgG or anti-SIX1. To confirm antibody specificity, the anti-SIX1 was pre-incubated with recombinant GST-SIX1 protein or GST for 1 h prior to applying to tissue. Scale bar, 100  $\mu$ m. (B) Immunoblot analysis of lysates from A375 (left panel) or SK-MEL-2 (right panel) cells infected with control shRNA or SIX1 shRNA using antibodies specific for anti-SIX1  $\beta$ -actin, a loading control. MW, molecular weight.
